# Supplementary material for: Lipidomic analysis of cancer cells cultivated at acidic pH reveals phospholipid fatty acids remodelling associated with transcriptional reprogramming
Source: PubMed Central journal article supplement (PMC7191909; doi:10.1080/14756366.2020.1748025), 2020-04-20
Supplement: IENZ_A_1748025_SM6072.pdf [file IENZ_A_1748025_SM6072.pdf]

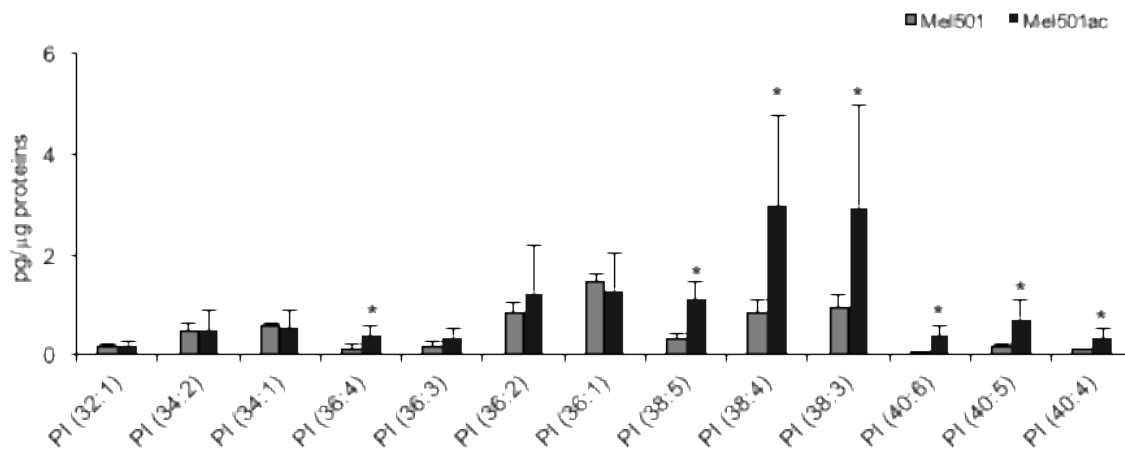

**Figure S1. Molecular species of PI of Mel501 cells cultured in buffered (Mel501) and in acidic conditions (Mel501ac).** Lipid extracts were analysed by LC/MS-MS. Data are expressed as pg of lipid species/ $\mu$ g of proteins. Mean values  $\pm$ S.D. (n = 6, Mel501; n=4, Mel501ac) are shown (\*p<0.05, Mel501 vs Mel501ac; # lipid species exclusively found in Mel501ac). The inserted panels expand the vertical axis to allow comparison of low abundance lipid subclasses.

| Symbol                                                        | Entry          | Forward                  | Reverse                  |
|---------------------------------------------------------------|----------------|--------------------------|--------------------------|
| <b>Palmitate elongation</b>                                   |                |                          |                          |
| <b>ELOVL1</b>                                                 | NM_001256402.1 | TGAAGCACGCAGTTCCTGAT     | GGAGAAGAGGAAGAGCCAGG     |
| <b>ELOVL2</b>                                                 | NM_017770.3    | CGCTGCGGATCATGGAACAT     | GTCCAACATGAACCACCCTCT    |
| <b>ELOVL3</b>                                                 | NM_152310.2    | ACCTCATTCCCCATAGCCCT     | TGCCCCCAGGATACTGAAGA     |
| <b>ELOVL4</b>                                                 | NM_022726.3    | AGTTCTACCGCTGGACCTG      | TGATCCCATGAATAACTCTCTGAA |
| <b>ELOVL5</b>                                                 | NM_021814.4    | GCGCTTGATTTCATCCTTCGG    | CCATTTGAAAACCTTTTAGCCCA  |
| <b>ELOVL6</b>                                                 | NM_001130721.1 | AAAGCACCCGAAGTAGGAGA     | GCCCGCAAGGCATAGTAAGA     |
| <b>ELOVL7</b>                                                 | NM_024930.2    | AGATGCTGATCCAAGAGTTGAAG  | TGAGTTCAAAGGGCTTGCGA     |
| <b>Desaturation</b>                                           |                |                          |                          |
| <b>SCD</b>                                                    | NM_005063.4    | TTCCCGACGTGGCTTTTTTCT    | AGCCAGGTTTGTAGTACCTCC    |
| <b>SCD5</b>                                                   | NM_001037582.2 | ACTCTGCTCTGGGCTACTT      | GAGTACTTGTGGTGGGCTCG     |
| <b>FADS1</b>                                                  | NM_013402.4    | CAGCTATGGCCCCGAC         | ACAAAGGGATCCGTGGCAT      |
| <b>FADS2</b>                                                  | NM_004265.3    | CAGTCGGCAGGCAGCAT        | GGAAGGCATCCGTTCATCT      |
| <b>FADS3</b>                                                  | NM_021727.4    | AGGACTCGTGCGTGCAG        | GAAGGCATCCGTGGCGT        |
| <b>Conjugation of long acyl chain fatty acids to acyl CoA</b> |                |                          |                          |
| <b>ACSL1</b>                                                  | NM_001286710.1 | GAGCTTTTGCAGCACTCACC     | ACAAGGGCCATTATTTGACACC   |
| <b>ACSL3</b>                                                  | NM_004457      | ATTGTGCATACCATGGCTGCAGTG | TCTGGAATCCTTTCTGCCATCCCA |
| <b>ACSL4</b>                                                  | NM_004458      | TGGGCATTCTCCAAGTAGACCAA  | ACTGGCCTGTCATTCCAGCTATCA |
| <b>ACSL5</b>                                                  | NM_016234      | TCAGTCATCACATTCTTCCGGGCA | CCAGCTTCACGTAATTGCAAGCCA |
| <b>ACSL6</b>                                                  | NM_015256      | AGCTGGCCTGCTACACATATTCCA | TCCACATGCTCTAGCAGAAGCACA |
| <b>Lysophospholipid acetyl transferases</b>                   |                |                          |                          |
| <b>LPCAT1/<br/>AGPAT9</b>                                     | NM_024830      | GGCGGAACCCCTTCGTG        | CACAACCTTCTCCACAGGG      |
| <b>LPCAT2/<br/>AGPAT1<br/>1</b>                               | NM_017839      | AGTATGTGATTGGCCTGGCTGTCT | TCCAAGGGAAGCCTGTAGAATGGT |
| <b>LPCAT3/<br/>MBOAT5</b>                                     | NM_005768      | AACAGACCATCCACTGGCTCTTCA | TCAGGAAGAAGATGTGGCCAAGGA |
| <b>LPCAT4/<br/>MBOAT2</b>                                     | NM_001321266.1 | TTTGCATGGACGCTAGCTGA     | GTTGGACTGAAGGAGGTTTCGT   |
| <b>LPEAT2/<br/>LPCAT4</b>                                     | NM_153613      | GTAGGGAGCTTACCTGTGATTGT  | CCACATAGCCAGCGGACA       |
| <b>LPEAT1/<br/>MBOAT1</b>                                     | NM_001080480.2 | CAACCACCCAAGAGCACCC      | ACCACAAAATTACCTGGTCC     |
| <b>LPIAT1/<br/>MBOAT7</b>                                     | NM_024298.4    | GTGGGAATCATGACAGGCC      | GGATCATGTAGAAGAGGCGGG    |
| <b>LPAAT1/<br/>AGPAT1</b>                                     | NM_006411.3    | CCCACCATTCTACCGCTAT      | ATCCATTCTGGCCACCTCAG     |
| <b>LPAAT2/<br/>AGPAT2</b>                                     | NM_001012727   | CCCGTGGCCTCATCATGTA      | CGATGGGCACGTTCTCCC       |
| <b>LPAAT3/<br/>AGPAT3</b>                                     | NM_001037553.1 | TTGTCTTCGTGGTGGTGGT      | ATGACCAGTTGGCTCCAGAGT    |
| <b>LPAAT4/<br/>AGPAT4</b>                                     | NM_020133.2    | ATGCACCATCTTACGGACC      | GACCTTGGAGCCCCCTAACA     |
| <b>LPAAT5/<br/>AGPAT5</b>                                     | NM_018361.3    | TTGCTCAGCATGGAGGAATCT    | TGCCTGACTAGCTGAAAGGAC    |

**Table S1. Primers used for qRT-PCR. The symbols used in the main text are indicated in bold.**
